# Supplementary material for: A Function for the hnRNP A1/A2 Proteins in Transcription Elongation
Source: PubMed Central journal article supplement (PMC4444011; doi:10.1371/journal.pone.0126654), 2015-05-26
Supplement: pone.0126654.s001.pdf [file pone.0126654.s001.pdf]

# Figure A

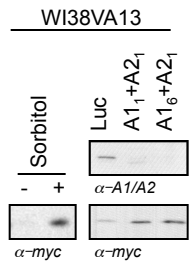

# Figure B

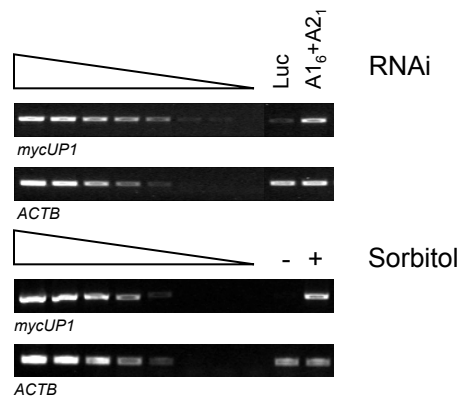

Figure C

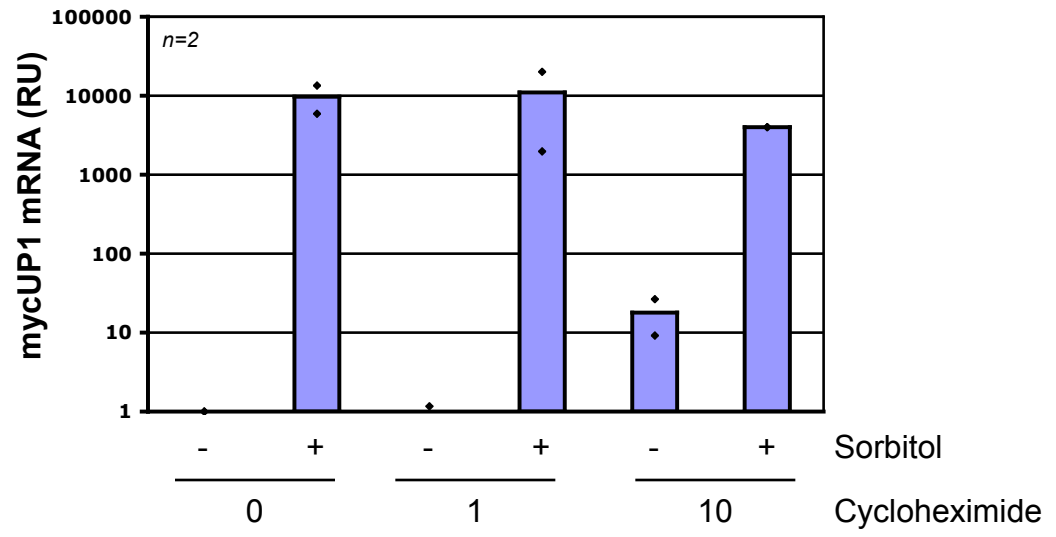

**Figure D**

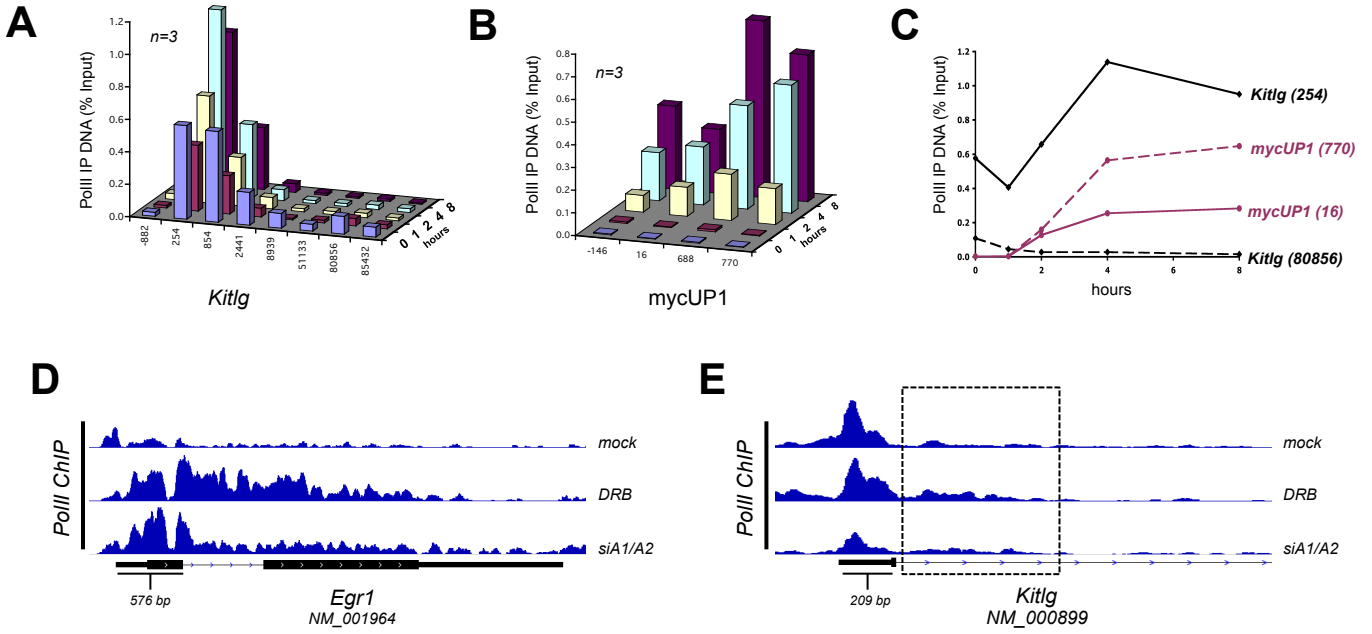

**Table A.** Sequences of siRNAs.

| <b>Gene target</b> | <b>siRNA name</b> | <b>SEQUENCE</b>       |
|--------------------|-------------------|-----------------------|
| hnRNP-A1           | A1 <sub>1</sub>   | UGGGGAACGCUCACGGACU   |
| hnRNP-A1           | A1 <sub>2</sub>   | UGAGAGAUCCAAACACCAA   |
| hnRNP-A1           | A1 <sub>5</sub>   | AUCAUGACUGACCGAGGCA   |
| hnRNP-A1           | A1 <sub>6</sub>   | CUUUGGUGGUGGUCGUGGA   |
| hnRNP-A2           | A2 <sub>1</sub>   | GCUUUGAAACCACAGAAGA   |
| luciferase         | luc               | AACAUCACGUACGCGGAAUAC |

**Table B.** Oligonucleotides used for RT-PCR analysis.

**RT Reaction**  
 RT101 GAGGACTCGAGCTCAAGCTTTTTTTTTTTTTTTTTTTVN  
 RT102\_7SK GAGGACTCGAGCTCAAGCGCCTCATTGGATGTGTCTG

|                        | Forward        |                          | Reverse        |                            |
|------------------------|----------------|--------------------------|----------------|----------------------------|
| <b>sqRT-PCR</b>        |                |                          |                |                            |
| ACTB                   | ACTB-F         | GCGGGAAATCGTGC GTGACATT  | ACTB-R         | GATGGAGTTGAAGGTAGTTTCGTG   |
| CMVmycUP1              | UPI-F          | CAAGAGAAGATTCTCAGC       | RT102          | GAGGACTCGAGCTCAAGC         |
| <b>qRT-PCR (fig 2)</b> |                |                          |                |                            |
| ACTB                   | ACTB_gbl_for_1 | TTCCTGGGCATGGAGTC        | ACTB_gbl_rev_1 | CAGGTCTTTGCGGATGTC         |
| CMVmycUP1              | pcDNA-F1       | CTGCAGATATCCAGCACAGT     | RT102          | GAGGACTCGAGCTCAAGC         |
| <b>qRT-PCR</b>         |                |                          |                |                            |
| mycUP1                 | pcDNA-F1       | CTGCAGATATCCAGCACAGT     | RT102          | GAGGACTCGAGCTCAAGC         |
| EGR1                   | qRT EGR1-F4    | TGGGTGCCGCTGAGTAAATG     | qRT EGR1-R4    | CTGACCCGAGAGTCTTTTCCTG     |
| KITLG                  | qRT KITLG-F1   | CAAAAATCCCCTGGAGAC       | qRT KITLG-R1   | CAACTGCCCTTGTAAGACTTGG     |
| 7SK (1)                | qRT 7SK-F1     | GAGGGCGATCTGGCTGCGACAT   | qRT 7SK-R1     | ACATGGAGCGGTGAGGGAGGAA     |
| 7SK (2)                | qRT 7SK-F2     | AGGACCGGTCTTCGGTCAA      | qRT 7SK-R2     | TCATTTGGATGTGTCTGGAGTCT    |
| 7SK (3)                | qRT 7SK-F3     | CATCCCCGATAGAGGAGGAC     | RT102          | GAGGACTCGAGCTCAAGC         |
| ACTB                   | qRT ACTB-F1    | GCGGGAAATCGTGC GTGACATT  | qRT ACTB-R1    | GATGGAGTTGAAGGTAGTTTCGTG   |
| GAPDH                  | qRT GAPDH F2   | TGCCACCAACTGCTTAGC       | qRT GAPDH-R2   | GGCATGGACTGTGGTCATGAG      |
| B2M                    | qRT B2M-F1     | TGCTGTCTCCATGTTGATGTATCT | qRT B2M-R1     | TCTCTGCTCCCCACCTTAAGT      |
| RPL13A                 | qRT RPL13A-F1  | CCTGGAGGAGAAGAGGAAAGAGA  | qRT RPL13A-R1  | TTGAGGACCTCTGTGTAATTTGTCAA |

**Table C.** Oligonucleotides used for qPCR time-course analysis of transcription and for chromatin immunoprecipitation assays.

| Gene   | Amplicon ID | Forward Primer           | Reverse Primer           |
|--------|-------------|--------------------------|--------------------------|
| mycUP1 | -146        | ATGGTGATGCGGTTTTGGCAG    | AAGTCCCGTTGATTTTGGTGCC   |
| mycUP1 | 16          | ATTGACGCAAATGGGCGGTAG    | TTTAAACGCTAGCCAGCTTGGG   |
| mycUP1 | 688         | GATGACCATGACTCTGTGGA     | TCTGCAGAATTCTTAGCGAC     |
| mycUP1 | 770         | GAAGCAAGAGATGGCTAGTG     | AACTAGAAGGCACAGTCGAG     |
| Egr1   | -1625       | TCCTTCCCCACATTCTTTTCTGC  | ACCCCAAAGGGAACAGGGATTTC  |
| Egr1   | -807        | ACAGTGTCCCAAGAACCAAGTG   | TCGATCTATGGCACGGTGTCTTTC |
| Egr1   | -65         | TGCCATATTAGGGCTTCTGTCTTC | ATTGAAGGGTCTGGAACGGC     |
| Egr1   | 2224        | AAGTTTGCCAGGAGCGATGAAC   | AGGCCACAACACTTTTGTCTGC   |
| Egr1   | 3443        | TTGGCCAACAATCCTTTCTGCC   | TTGGACATGGCTGTTTCAGGC    |
| Kitlg  | -882        | TGAGAAAGTGAGAACGCAGTCC   | AAACCTGTAATCAGGGCGAAGC   |
| Kitlg  | 254         | TAATCTGCCAAACTTCTGGGGC   | GAGAAGCAGGCAAGGGCG       |
| Kitlg  | 854         | AGCCAGTGTCAAGTTTGGAGC    | AACATTCCATGGCCAAAAGCC    |
| Kitlg  | 2441        | TGCTGCCGACCAGAGAAATTTG   | AGGGCCTGCACTTTAACTTGTG   |
| Kitlg  | 8939        | TTCACAGCACTTTTCCGCTGAG   | AATGCGCTGTGGTTAATGCCAG   |
| Kitlg  | 51133       | TGTTCGTTTCTGCGAAGACCAG   | TTTTTGGCACCCATTCCCACTC   |
| Kitlg  | 80856       | TGGGGCTTAAATGCCTTGTGTC   | ACCTCAGCTTTGATTGTCACCC   |
| Kitlg  | 85432       | AACCCAGGTGCTTTGAGAAGC    | ACAGTCAATGCCACACACTGAG   |

*The amplicon ID indicates the position of the central base pair of the amplicon relative to the transcription start site based on Aceview database for the RefSeq NM\_000899 for Kitlg.*
